# Supplementary material for: Tuning Immobilized Enzyme Features by Combining Solid-Phase Physicochemical Modification and Mineralization
Source: MDPI journal article supplement (doi:10.3390/ijms232112808), 2022-10-24
Supplement: s1 [file s1]

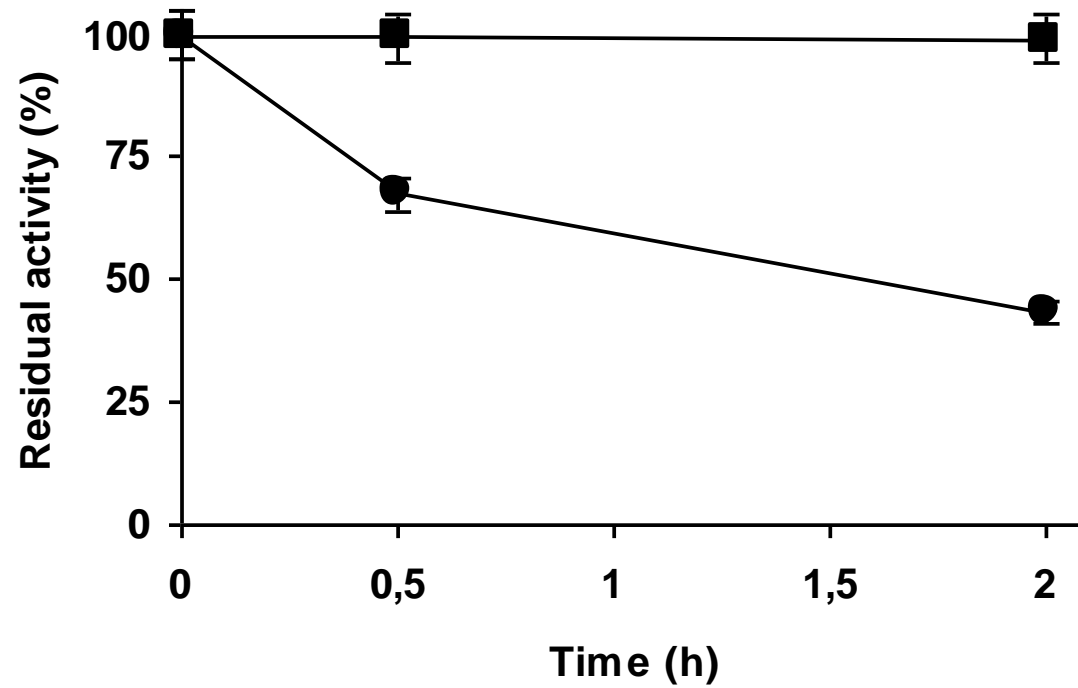

**Figure S1.** Immobilization course of TLL over octyl agarose using enzyme loading of 20 mg/g. The immobilization was performed in 5 mM sodium phosphate at 25 °C and pH 7.0. Squares: reference and circles: supernatant. Other specifications are described in Methods.

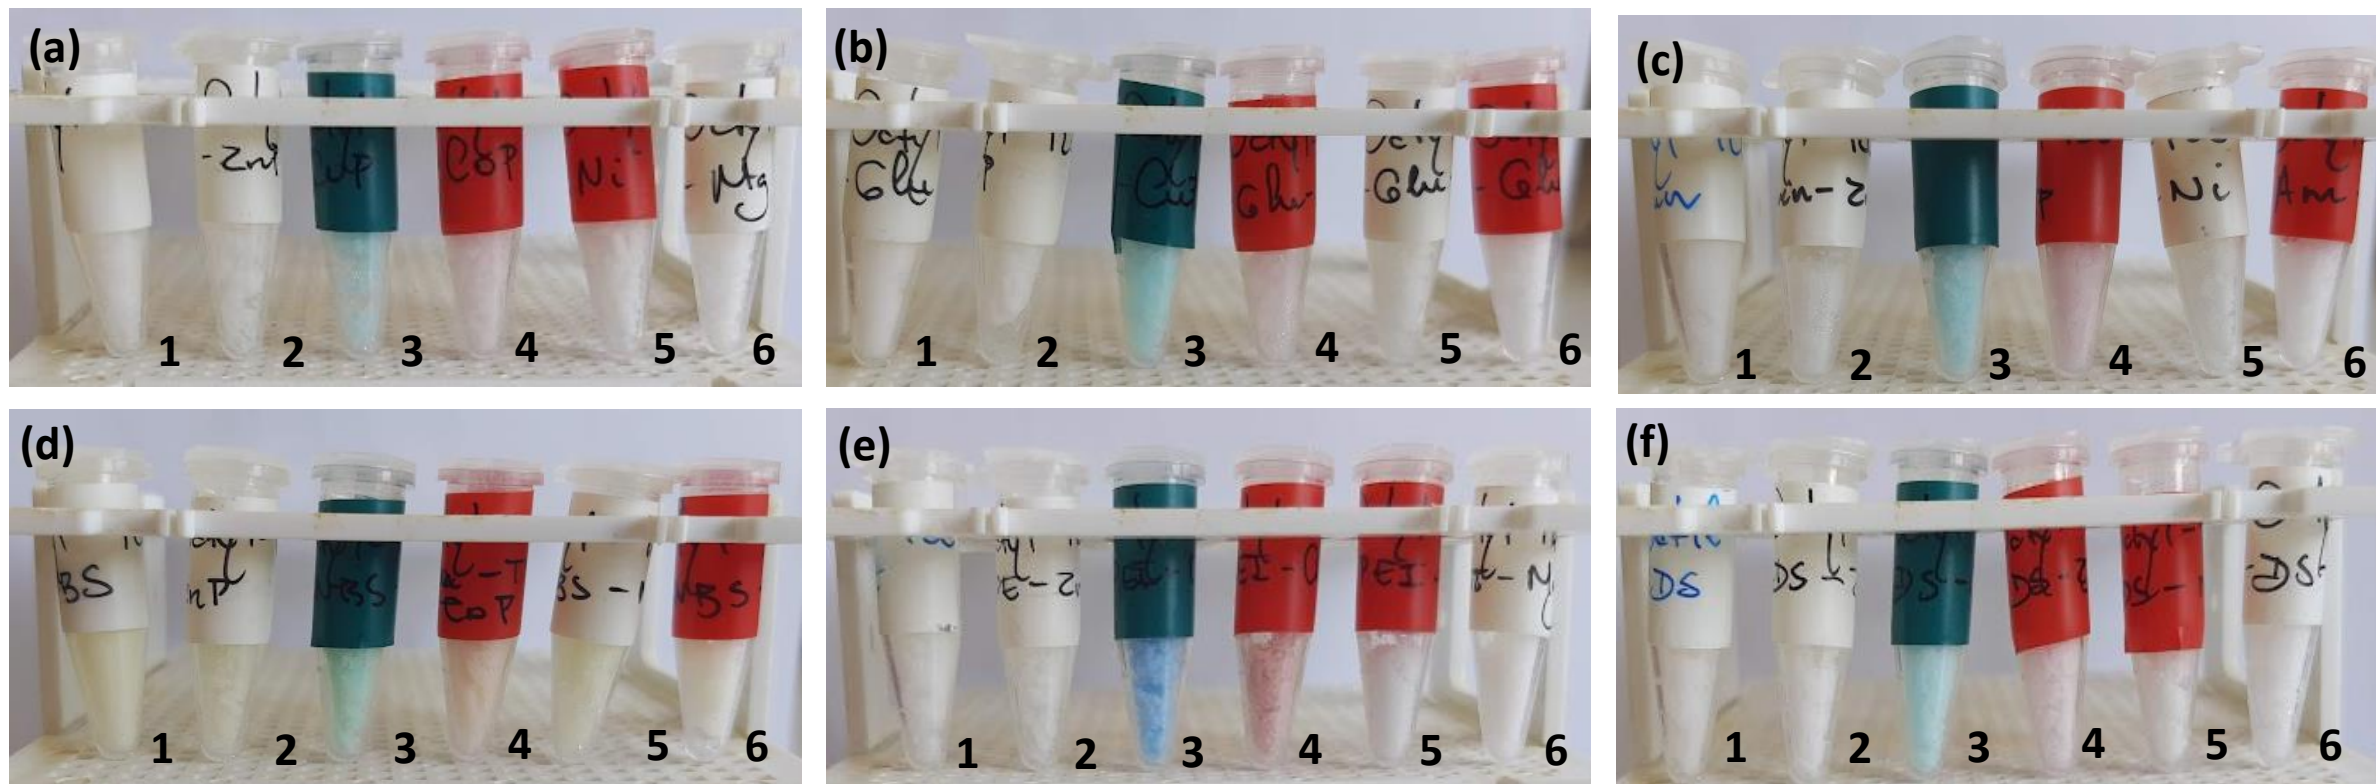

**Figure S2.** (a) Octyl-TLL biocatalysts modified with (b) 1% glutaraldehyde, (c) amination using 2 M ethylenediamine, (d) 1 mM picrylsulfonic acid, (e) 10% polyethylenimine, and (f) 10% dextran sulfate (1) untreated and (2-6) treated with (2)  $\text{ZnCl}_2$ /sodium phosphate, (3)  $\text{CuCl}_2$ /sodium phosphate, (4)  $\text{CoCl}_2$ /sodium phosphate, (5)  $\text{NiCl}_2$ /sodium phosphate, and (6)  $\text{MgCl}_2$ /sodium phosphate. Other specifications are described in Methods.

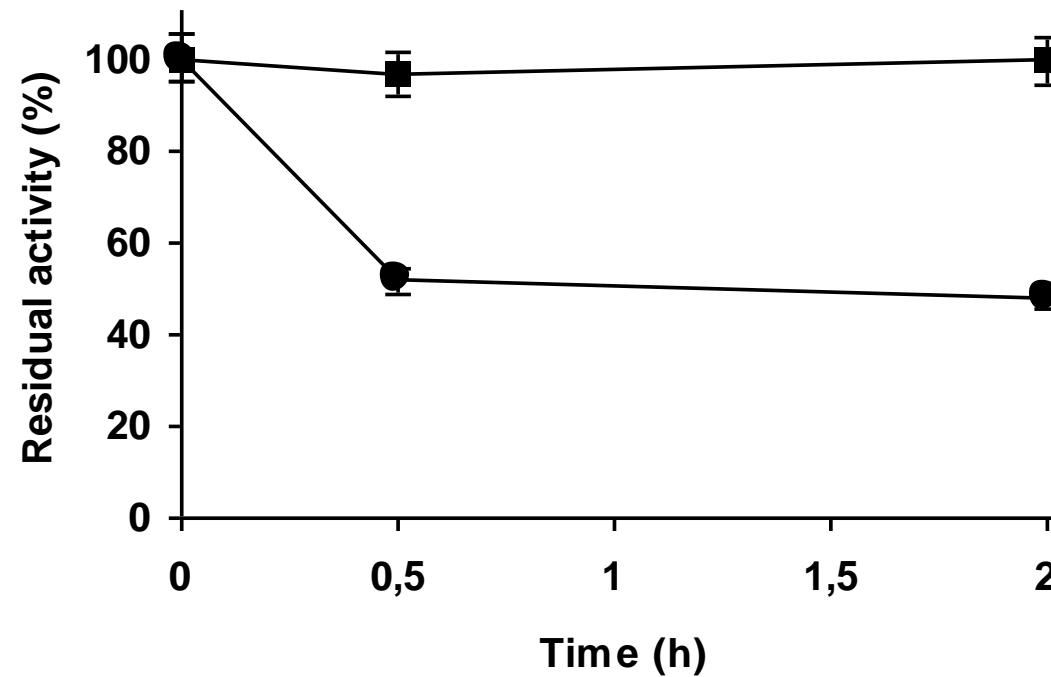

**Figure S3.** Immobilization course of CALB over octyl agarose using enzyme loading of 20 mg/g. The immobilization was performed in 5 mM sodium phosphate at 25 °C and pH 7.0. Squares: reference and circles: supernatant. Other specifications are described in Methods.

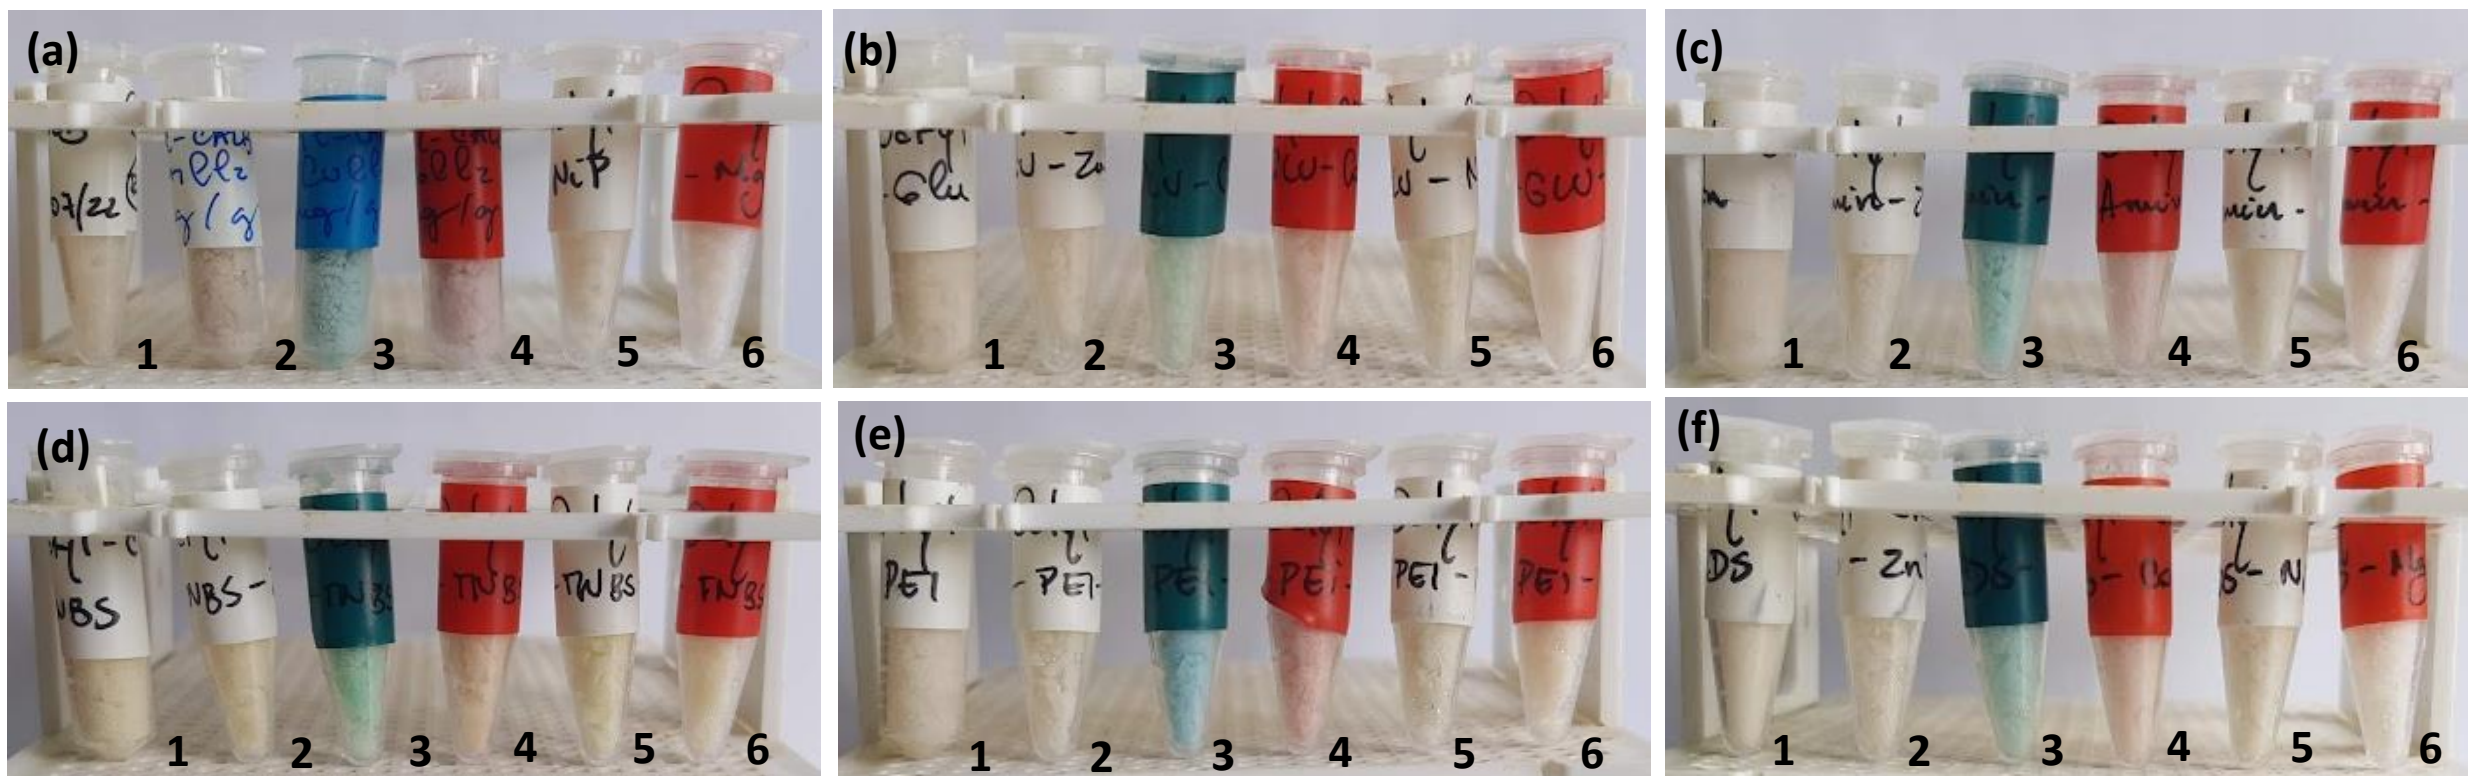

**Figure S4.** (a) Octyl-CALB biocatalysts modified with (b) 1% glutaraldehyde, (c) amination using 2 M ethylenediamine, (d) 1 mM picrylsulfonic acid, (e) 10% polyethylenimine, and (f) 10% dextran sulfate (1) untreated and (2-6) treated with (2)  $\text{ZnCl}_2$ /sodium phosphate, (3)  $\text{CuCl}_2$ /sodium phosphate, (4)  $\text{CoCl}_2$ /sodium phosphate, (5)  $\text{NiCl}_2$ /sodium phosphate, and (6)  $\text{MgCl}_2$ /sodium phosphate. Other specifications are described in Methods.
